# Supplementary material
Source: publisher figshare collection journal article supplement (https://springernature.figshare.com/ndownloader/files/36665670)

# Identification of HMGB2 Associated with Proliferation, Invasion and Prognosis in Lung Adenocarcinoma via Weighted Gene Co-Expression Network Analysis

Xie Qiu<sup>1\*</sup>, Wei Liu<sup>2\*</sup>, Yifan Zheng<sup>3\*</sup>, Kai Zeng<sup>4</sup>, Hao Wang<sup>5</sup>, Haijun Sun<sup>1#</sup>, Jianhua Dai<sup>1#</sup>

## Supplementary Table Legend

Table S1. Clinical informations and IHC score of patients with LUAD

## Figure S1. Original blot and images.

Figure 9A Original blot and images.

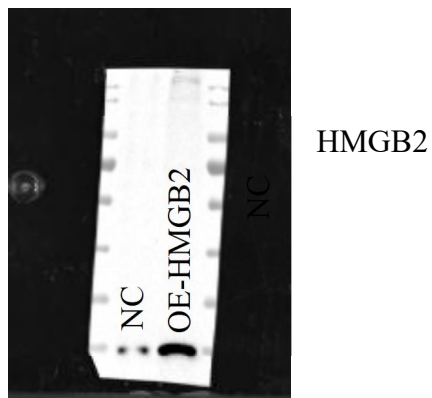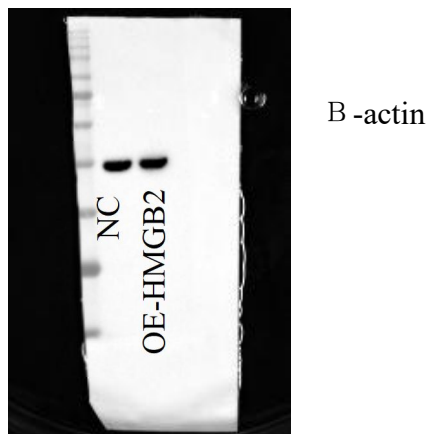

Figure 10A Original blot and images.

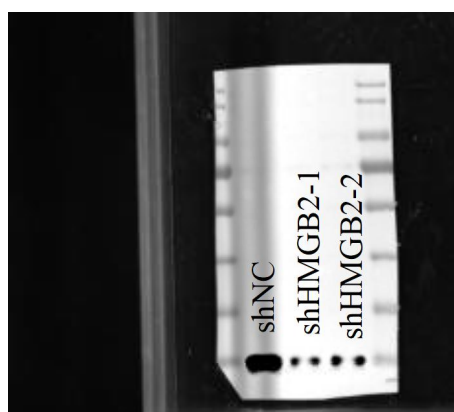

HMGB2

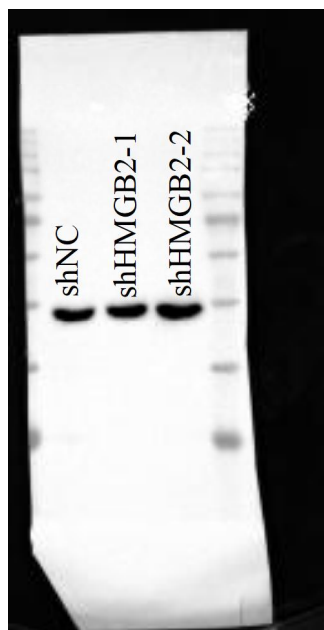

B -actin

**Figure S2. HMGB2 expression is not correlated with survival of patients with LUAD.**

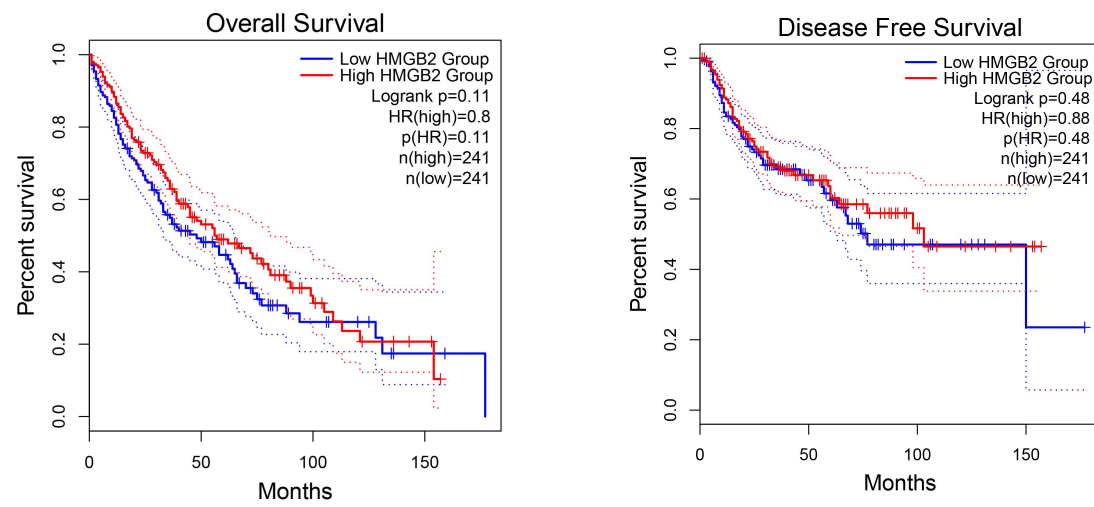

Supplement: Supplementary file [file 36665670]
